# PIP<sub>2</sub> regulation of TRPC5 channel activation and desensitization

**Mehk Ningoo<sup>1,2</sup>, Leigh D. Plant<sup>1,3</sup>, Anna Greka<sup>4,5</sup>, and Diomedes E. Logothetis<sup>1,3,6,7</sup>**

<sup>1</sup>Department of Pharmaceutical Sciences, School of Pharmacy, Bouvé College of Health Sciences, <sup>3</sup>Center for Drug Discovery, and <sup>6</sup>Department of Chemistry and Chemical Biology, College of Science, Northeastern University, Boston, MA

<sup>4</sup>Department of Medicine, Brigham and Women's Hospital and Harvard Medical School, Boston, MA 02115

<sup>5</sup>Broad Institute of MIT and Harvard, Cambridge, MA 02142

<sup>7</sup>To whom correspondence should be addressed. E-mail: d.logothetis@northeastern.edu

<sup>2</sup>Present address: Graduate School of Biological Sciences, Icahn School of Medicine at Mount Sinai, New York, NY 10029

**Running title:** *PIP<sub>2</sub> regulation of TRPC5 channels*

Keywords: Transient receptor potential channels (TRP channels) | Phosphoinositide | Phosphatidylinositol signaling | TRPC5 channels | Phosphatidylinositol bis-phosphate (PIP<sub>2</sub>) | Diacyl Glycerol (DAG) | Protein kinase C (PKC)

**Transient receptor potential canonical type 5 (TRPC5) channels are expressed in the brain and kidney, and have been identified as promising therapeutic targets whose selective inhibition can protect against diseases driven by a leaky kidney filter. They are activated by elevated levels of extracellular Ca<sup>2+</sup> or application of lanthanide ions but also by G protein (G<sub>q/11</sub>) stimulation. Phosphatidylinositol bis-phosphate (PIP<sub>2</sub>) hydrolysis leads to protein kinase C- (PKC-) mediated phosphorylation of TRPC5 channels and desensitization of their activity. Even though PIP<sub>2</sub> regulation of TRP channels is being widely studied, the roles of PIP<sub>2</sub> in maintaining TRPC5 channel activity, the PIP<sub>2</sub> involvement in channel stimulation by its hydrolysis product diacyl glycerol (DAG), or the desensitization of activity by DAG-stimulated PKC activity remain unclear. Here, we show that PIP<sub>2</sub> controls both the PKC-mediated inhibition of TRPC5 currents as well as the activation by DAG and lanthanides and that it accomplishes this through control of gating rather than channel cell surface density. The mechanistic insights achieved by the present work promise to aid in the development of more selective and precise molecules to block TRPC5 channel activity and illuminate new therapeutic opportunities for targeted therapies for a group of diseases for which there is currently a great unmet need.**

TRPC5 channels belong to the classical transient receptor potential (TRPC) family of nonselective, calcium permeable cation channels (1). They are widely expressed in many tissues, including the brain, where they are involved in fear-related behavior, regulating hippocampal neurite length as well as growth cone morphology, and the kidney, where they are largely implicated in chronic kidney disease. In kidney podocytes, cells essential for the kidney filter, TRPC5 channels may be promising

therapeutic targets, because their selective inhibition is protective against diseases driven by a leaky kidney filter in rodents (2-6). Mammalian TRPC5 channels are transiently stimulated by the action of phospholipase C (PLC) enzymes, either GTP-binding protein coupled receptors (GPCRs) coupled to G<sub>q/11</sub> that signal through PLCβ<sub>1</sub> or by tyrosine kinase-coupled receptors through PLCγ<sub>2</sub> (1-4). Activation of PLC causes the hydrolysis of plasma membrane phosphatidylinositol (4,7) bis-phosphate (PIP<sub>2</sub>) to form inositol 1,4,5-triphosphate (IP<sub>3</sub>) that releases Ca<sup>2+</sup> from intracellular stores and diacylglycerol (DAG) which activates protein kinase C (PKC) (1-7).

Since the mid-1990s PI(4,5)P<sub>2</sub> (PIP<sub>2</sub>) has been appreciated to act beyond its role as a precursor to the ubiquitous signaling of its products (e.g. IP<sub>3</sub>, DAG, PIP<sub>3</sub>) as a direct regulator of membrane protein function, especially ion channel proteins (8,9). Co-crystal structures of Kir channels with PIP<sub>2</sub> have revealed at atomic resolution specific residue interactions with the phosphates at positions 4' and 5' of the inositol ring of PI(4,5)P<sub>2</sub> around the two channel gates of Kir channels (10-12). Microsecond-long MD simulations have revealed how gating molecules, like the Gβγ subunits or Na<sup>+</sup> ions, open one, the other or both gates of Kir3 channels by enhancing specific residue interactions with PIP<sub>2</sub> (13). The relationship of TRPC5 with PIP<sub>2</sub> has not yet been structurally elucidated (14).

TRPC5 channels can also be steadily activated by elevated levels of extracellular Ca<sup>2+</sup> or application of lanthanide ions, such as lanthanum (La<sup>3+</sup>) and gadolinium (Gd<sup>3+</sup>) (15, 16). These cations bind to an extracellular cation binding site (eCBS) located in the vicinity of the channel's pore entrance (15, 16). The eCBS consists of two acidic Glu residues, E543 and E595, mutation of either of which to Gln renders TRPC5 lanthanide-insensitive. The Gln mutant channels can still be activated through PLC stimulation, suggesting that the two mechanisms of channel activation are independent (17).

Although it had been thought that the PIP<sub>2</sub> hydrolysis products IP<sub>3</sub> and DAG do not themselves activate TRPC5 channels, evidence for a mechanism that renders the channel sensitive to DAG-mediated activation has been presented (2). This mechanism requires Gq-receptor mediated activation of PLC and hydrolysis of PIP<sub>2</sub> causing a conformational change in the C-terminus of TRPC5 that leads to dissociation of the Na<sup>+</sup>/H<sup>+</sup> exchanger regulatory factor (NHERF) protein from a PDZ-binding motif (2). NHERF proteins serve to link integral membrane proteins to the cytoskeleton and NHERF dissociation allows the channel to be activated by DAG (2).

TRPC5 channels that are dependent on PLCβ or PLCγ activation, exhibit current desensitization by a mechanism attributed to PKC-mediated phosphorylation (17,18). In this scheme, DAG-mediated activation of TRPC5 channels precedes activation of PKC which phosphorylates the channel at T972 to cause desensitization by an unknown mechanism (18). PKC phosphorylation of the channel at T972 has been proposed to increase the affinity of the C-terminus of the channel to bind to NHERF1, blocking activation by DAG (2). Mutating the Thr residue to Ala (T972A) protects the channels from being phosphorylated by PKC and prevents desensitization (2), favoring DAG over NHERF binding to result in channel activation. For G protein gated Kir3 channels, PKC-mediated channel phosphorylation has been shown to weaken channel-PIP<sub>2</sub> interactions and, together with PIP<sub>2</sub> hydrolysis, to underlie current desensitization (20, 21). To date, even though PIP<sub>2</sub> regulation of TRP channels is being widely studied (18, 19, 22), the roles of PIP<sub>2</sub> in maintaining TRPC5 channel activity, its involvement in the DAG-mediated stimulation and in PKC-mediated desensitization of activity remain unclear.

The present work provides evidence that trivalent cation and PLC-mediated activation of TRPC5 allosterically and independently converge on PIP<sub>2</sub> to gate the channel. Both the

PKC-mediated phosphorylation of T972 and direct PIP<sub>2</sub> depletion contribute to TRPC5 current inhibition. PKC-phosphorylation of the channel weakens channel-PIP<sub>2</sub> interactions, while DAG-mediated activation of the PKC-insensitive T972A mutant strengthens channel-PIP<sub>2</sub> interactions. Our findings support a paradigm whereby PIP<sub>2</sub> hydrolysis and DAG generation play a dual role in Gq/11 protein-mediated TRPC5 channel activation. First, in the absence of phosphorylation at T972, DAG is able to strengthen channel-PIP<sub>2</sub> interactions and stimulate activity. Second, DAG activates PKC that in turn phosphorylates the channel at T972, driving activity toward full inhibition by weakening channel-PIP<sub>2</sub> interactions and enabling loss of PIP<sub>2</sub> from the channel, given the surrounding depleted levels.

## Results

### Wortmannin speeds Gq-mediated inhibition kinetics of TRPC5 channels

Activation of Gq-signaling evokes a transient TRPC5 current that subsequently decreases in magnitude via a mechanism that is proposed to require phosphorylation of the channel at threonine 972 by PKC (18). To determine if the PKC-mediated decrease in TRPC5 currents is PIP<sub>2</sub> sensitive, we used whole-cell patch-clamp recording to study HEK293T cells transiently expressing mTRPC5-GFP under experimental conditions where PIP<sub>2</sub> levels were elevated or lowered. Double-rectifying TRPC5 currents were elicited by voltage ramps from -100 mV to +100 mV following application of 100 μM carbachol (CCh), an agonist at the Gq-coupled muscarinic type-3 (M3) receptors that are endogenously expressed in HEK293T cells (**Fig. 1A**) (24). Following the initial activation of the channel, TRPC5 currents spontaneously decreased in magnitude, as expected. To probe if the rate of PKC-mediated channel inhibition is PIP<sub>2</sub>-sensitive, we increased the level of PIP<sub>2</sub> in the HEK293 cells through two types of manipulations: First, we increased production of

PIP<sub>2</sub> by co-transfecting mTRPC5-GFP with phosphatidylinositol 4-phosphate 5 kinase (PIP-5K), the enzyme that phosphorylates PI(4)P at position 5' of the inositol ring. Second, we increased PIP<sub>2</sub> levels directly by including 200  $\mu$ M dioctanoyl-glycerol-PIP<sub>2</sub> (diC<sub>8</sub>-PIP<sub>2</sub>), a soluble analog of PIP<sub>2</sub> in the patch pipette, as before (25). Both PIP-5K overexpression and inclusion of diC<sub>8</sub>-PIP<sub>2</sub> in the patch pipette reduced the extent to which TRPC5 currents decreased following activation by CCh (**Fig. 1B**). Next, we studied the effect of depleting intracellular PIP<sub>2</sub> levels by incubating the cells in 20  $\mu$ M Wortmannin, a fungal sterol that at micromolar concentrations inhibits PI3K and PI4K, of which PI4K is required to generate PIP<sub>2</sub> (5). Following a one-hour incubation with Wortmannin, CCh-activated TRPC5 currents showed a higher rate of inhibition than untreated controls (**Fig. 1C**). Together, these findings indicate an inverse relationship between PIP<sub>2</sub> levels and PKC-induced inhibition of channel currents.

TRPC5 channels are also activated by extracellular trivalent lanthanide ions via a mechanism that is independent of Gq-signaling, does not activate PKC-mediated phosphorylation, and is not associated with a subsequent decrease in current (25). Application of 100  $\mu$ M Gd<sup>3+</sup> activated doubly-rectifying currents that were blocked by the TRPC5 inhibitor ML204 but did not decrease in magnitude over time (**Fig. 1D**) (26). Incubation with 20  $\mu$ M Wortmannin decreased the peak Gd<sup>3+</sup>-elicited currents by  $74.16 \pm 0.75\%$  compared to untreated control cells (**Fig. 1E, F**). Taken together, the results of figure 1 implicate multiple roles for PIP<sub>2</sub> in the activation and inhibition of TRPC5 channels by both independent gating mechanisms, stimulation by Gq signaling and lanthanides.

### **PMA-mediated inhibition weakens channel-PIP<sub>2</sub> interactions**

The spontaneous decrease in TRPC5 current observed following activation by CCh is

proposed to be mediated by subsequent PKC-mediated phosphorylation of the channel (18). The two key molecules of interest in the desensitization pathway are the PKC enzymes which induce desensitization by phosphorylation and PIP<sub>2</sub>, which opposes desensitization. To control the kinetics of TRPC5 current inhibition, we used optogenetic-activation of 5'-phosphatase to dephosphorylate PIP<sub>2</sub> in cells illuminated by 460 nm (blue) light. Briefly, blue light-induces dimerization between two plant proteins, cryptochrome 2 (CRY2) and the transcription factor CIBN to control the plasma membrane PIP<sub>2</sub> levels rapidly, locally, and reversibly. The 5'-phosphatase domain of OCRL (5'-ptaseOCRL), which acts on PI(4,5)P<sub>2</sub> and PI(3,4,5)P<sub>3</sub>, is fused to the photolyase homology region domain of CRY2 (23). Stimulation of the CRY2-binding domain, CIBN, results in nearly instantaneous recruitment of 5'-ptaseOCRL to the plasma membrane, causing rapid PI(4,5)P<sub>2</sub> dephosphorylation to PI(4)P (23). We expressed the TRPC5 channel, light-activated CRY2-5'PTASEOCRL and CIBN-CAAX-GFP proteins in HEK-293T cells in order to perform the blue-light activated phosphatase experiment in the whole-cell mode of the patch-clamp technique. Gd<sup>3+</sup>-activated inward currents were allowed to stabilize before a blue light (460 nm, shown by the blue panels) was shone to activate the inositol 5'-phosphatase and deplete membrane PIP<sub>2</sub> until the current declined and reached a steady state (**Fig. 2A**).

Next, to examine the effect of PKC-mediated inhibition of the channel without causing a concurrent hydrolysis of PIP<sub>2</sub>, PKC was activated using 100nM phorbol-12-myristate-13-acetate (PMA) (**Fig. 2B**). To assess the role of PIP<sub>2</sub> on the PKC effect, we increased intracellular PIP<sub>2</sub> levels using diC<sub>8</sub>-PIP<sub>2</sub> in the pipette (**Fig. 2B**). We observed that inclusion of diC<sub>8</sub>-PIP<sub>2</sub> in the pipette solution decreased the rate and extent of desensitization induced by PMA (**Fig. 2E, F**). This emphasizes the significance of channel-PIP<sub>2</sub> interaction strength on the inhibition of channel by PKC-mediated



phosphorylation. We observed that selective dephosphorylation of PIP<sub>2</sub> (blue-light phosphatase assay) and activation of PKC enzymes using the drug PMA, individually inhibit approximately 50% of the channel current (**Fig. 2A, B**). Next, we probed the effect of PKC mediated effects on the strength of channel-PIP<sub>2</sub> interaction by comparing the kinetics of inhibition due to dephosphorylation of PIP<sub>2</sub> before and after the channel was treated with PMA. After the PMA-induced inhibition of TRPC5 currents reached a steady state (**Fig. 2C**), blue-light illumination yielded faster inhibition kinetics, suggesting that the PKC-mediated phosphorylation decreases channel-PIP<sub>2</sub> interactions (**Fig. 2A, C, E**).

To test whether the complete current inhibition observed during PLC-activation (see **Fig. 1A**) could be mimicked by simultaneous PIP<sub>2</sub> hydrolysis and PKC-mediated effects, the Gd<sup>3+</sup>-activated channel was simultaneously treated with the PKC-activator PMA and blue-light to cause dephosphorylation of PIP<sub>2</sub>. This resulted in a complete inhibition (**Fig. 2D, F**) of channel currents similar to that observed in the Gq-activated system (**Fig. 1A**), suggesting that PKC activation and PIP<sub>2</sub> hydrolysis are both involved to cause complete channel inhibition when TRPC5 channels are activated by the Gq-receptor signaling pathway. Next, we determined the effect of increased levels of intracellular PIP<sub>2</sub> by repeating the same experiment in cells studied with 200μM diC<sub>8</sub>-PIP<sub>2</sub> in the recording pipette. Elevated levels of PIP<sub>2</sub>, and thus increased channel-PIP<sub>2</sub> interactions, decreased the rate of channel inhibition by simultaneous PIP<sub>2</sub> dephosphorylation and PKC activation (**Fig. 2D, E**) but did not affect the extent of inhibition (**Fig. 2D, F**). Given these results, we conclude that the rate of desensitization of TRPC5 channels by PKC is inversely affected by intracellular PIP<sub>2</sub> levels.

### **OAG strengthens TRPC5 channel-PIP<sub>2</sub> interactions to stimulate channel activity**

The T972A TRPC5 mutant is PKC-insensitive, abolishing the desensitization observed on Gq-mediated activation of the channel and enabling direct activation by OAG (2, 17). Since our experiments thus far suggested that PKC mediated phosphorylation is dependent on channel-PIP<sub>2</sub> interactions, we investigated further whether the PKC-insensitive mutant channel differs from the wild-type channel in its interaction with PIP<sub>2</sub>. We used 100 μM GdCl<sub>3</sub> to activate the wild-type and T972A mutant channels to bypass the activation of the PLC pathway and assess channel-PIP<sub>2</sub> strength by exposure to blue-light (**Fig. 3A**). The mutant channel exhibited a significantly slower inhibition (**Fig. 3A, B**) than the wild-type channel indicating a stronger channel-PIP<sub>2</sub> interaction compared to the wild-type. This result also suggested the occurrence of basal PKC-dependent phosphorylation under unstimulated conditions. From this observation we can conclude that the PKC-insensitive T972A mutant channel has stronger channel-PIP<sub>2</sub> interactions compared to the wild-type channel. The TRPC5 channel is thought to be activated by DAG, which is endogenously produced through hydrolysis of PIP<sub>2</sub> by PLC enzymes. To understand the mechanism by which DAG is activating the channel and whether it occurs through modulating the channel's interaction with the remaining non-hydrolyzed PIP<sub>2</sub>, we used a saturating concentration of OAG (200μM) to activate the channel and compared its kinetics of inhibition upon blue-light induced PIP<sub>2</sub> dephosphorylation with that of a saturating concentration of Gd<sup>3+</sup> (150μM). Channels activated by OAG showed a slower inhibition upon dephosphorylation of PIP<sub>2</sub> than those activated by Gd<sup>3+</sup> (**Fig. 3D**) indicating that OAG activation is characterized by stronger interactions of the channel with PIP<sub>2</sub>. To look into the effect of PIP<sub>2</sub> levels on OAG-activated currents, we depleted PIP<sub>2</sub> levels using Wortmannin and increased intracellular PIP<sub>2</sub>

levels by including diC<sub>8</sub>-PIP<sub>2</sub> in the pipette solution. We observed that upon Wortmannin incubation, the peak current density of OAG-activated currents was significantly smaller than control (data not shown) or 200  $\mu$ M PIP<sub>2</sub> in the pipette solution. Interestingly, these varied PIP<sub>2</sub> levels that affect channel-PIP<sub>2</sub> interaction strength also affected the rate of inhibition of OAG-activated currents upon dephosphorylation of the membrane PIP<sub>2</sub> using the blue-light activated phosphatase assay. This indicated that the activation of the channel by DAG, similar to channel desensitization by PKC (Fig. 2), is dependent on the channel-PIP<sub>2</sub> interaction strength.

### **The surface-density of TRPC5 channels is not regulated by PIP<sub>2</sub> or OAG**

YFP-tagged TRPC5-T972A channels also expressed readily in HEK293T cells at levels similar to wild type channels ( $25 \pm 1$  particles per  $10 \mu\text{m}^2$ ;  $n = 12$ ) in both intact cells, or when cells were studied in TIRF-patch mode with control solution, 200  $\mu$ M OAG, or 200  $\mu$ M diC<sub>8</sub>-PIP<sub>2</sub> included in the pipette (Fig. 4C, D). Like wild type YFP-TRPC5 channels, the number of YFP-TRPC5-T972A channels at the cell membrane was not altered by treating cells with staurosporine, or via activation of 5'-ptaseOCL, irrespective of the solution in the patch-pipette (Fig. 4D). Together, these findings suggest that changes in the current density of TRPC5 channels observed following changes in the level of PIP<sub>2</sub>, or after activation of PKC result from the regulation of channel activity and not from modified trafficking of channels to, or from the cell membrane.

### **PIP<sub>2</sub> prevents PKC-mediated desensitization and promotes OAG-mediated activation in endogenously expressed TRPC5 channels**

Since TRPC5 channels are known to be highly expressed in the hippocampus, we utilized the hippocampal neuronal cell line HT-22 to study the channel in a native system (2). TRPC5 channel current was observed upon

Gd<sup>3+</sup> application (Fig. 5A, B) and like in the HEK293T cell overexpression system it was OAG insensitive (data not shown). To investigate the role of PIP<sub>2</sub> on PKC-mediated desensitization, we examined the rate and extent of inhibition via PMA with and without diC<sub>8</sub>-PIP<sub>2</sub> in the patch pipette. In the presence of increased intracellular PIP<sub>2</sub>, PKC-mediated inhibition was slower and less efficient (Fig. 5C, D), similar to observations in the HEK293T overexpression system (Fig. 2E). Next, to confirm the dependency of DAG-mediated activation on PIP<sub>2</sub> levels, we first incubated the cells in 1  $\mu$ M staurosporine to inhibit PKC. This made the channel sensitive to OAG activation, and produced further current stimulation by increased intracellular PIP<sub>2</sub> levels (Fig. 5E, F, G). Having diC<sub>8</sub>-PIP<sub>2</sub> in the patch-pipette gave higher peak currents compared to control, indicating that PIP<sub>2</sub> contributes to higher OAG-mediated channel activity. Altogether, these results indicate that PIP<sub>2</sub> regulation of endogenous TRPC5 channels mirrors its effect in heterologously expressed channels.

## **Discussion**

Until now, the role of PIP<sub>2</sub> in the mechanism that regulates TRPC5 channel activity after stimulation of G<sub>q/11</sub>-coupled receptors has remained largely elusive. Even though there is evidence that TRPC5 channels become DAG sensitive upon PLC-mediated hydrolysis of PIP<sub>2</sub>, the specific role of PIP<sub>2</sub> in channel activation or inhibition had not been probed (2). In this study, we show that TRPC5 channels are functionally coupled to PIP<sub>2</sub> and that DAG activation as well as PKC-mediated inhibition of the channel, through phosphorylation at T972, involve modulation of channel-PIP<sub>2</sub> interactions. Our findings consolidate and synthesize prior seemingly discrepant results on the role of PIP<sub>2</sub> into a single, coherent model.

We found that in trivalent ion-mediated channel gating, Gd<sup>3+</sup> strengthens channel-PIP<sub>2</sub>

interaction to cause sub-maximal channel activation (see model in **Fig. 6**, strength 4/5). PKC-mediated phosphorylation of the channel (PMA treatment) weakens channel-PIP<sub>2</sub> interactions and causes partial inhibition (strength 3/5). Similarly, PIP<sub>2</sub> depletion (5'-phosphatase) inhibits activity partially due to the high-affinity of the channel for PIP<sub>2</sub> that protects the channel from losing all of its interacting PIP<sub>2</sub> molecules in the Gd<sup>3+</sup> activated state (7). A combination of PIP<sub>2</sub> depletion and PKC-mediated channel phosphorylation fully inhibits currents below basal levels, as the channel is now less able to hold on to its interacting PIP<sub>2</sub> molecules (strength 1/5). Trivalent ion gating of TRPC5 channels is more straight-forward than Gq-mediated gating as activation and inhibition can be controlled separately as well as simultaneously.

G<sub>q/11</sub>-mediated gating is more complex due to the fact that all four components, PIP<sub>2</sub> depletion, DAG production and channel activation, DAG-mediated activation of PKC, and channel inhibition cannot be readily separated as with Gd<sup>3+</sup> gating. The activating molecule DAG interacts with the intracellular side of the channel to strengthen channel-PIP<sub>2</sub> interactions and yield maximal activation (strength 5/5), while protecting the channel from losing its PIP<sub>2</sub> despite the ongoing PLC-mediated hydrolysis. In order for DAG to stimulate activity, the dominating inhibitory PKC phosphorylation needs to be abrogated. The obligate activation of PKC by the generated DAG molecules phosphorylates the channel at T972 weakening channel-PIP<sub>2</sub> interactions (strength 1/5) and making the channel activation transient, as DAG-mediated activation is followed by complete inhibition of activity. Desensitization ensues as the hydrolyzed PIP<sub>2</sub> needs to be resynthesized and protein phosphatases need to dephosphorylate the channel to render it activatable again by DAG. Our model proposes that even through Gd<sup>3+</sup> and DAG use different pathways to activate TRPC5 channels they converge at the level of channel-

PIP<sub>2</sub> interactions which they control allosterically. Thus, in this model, it is PIP<sub>2</sub> and its interactions with TRPC5 that should be deemed essential for channel activation and inhibition.

TRPC3/6/7 channels are highly sensitive to PLC-mediated PIP<sub>2</sub> depletion which correlates with the spontaneous inhibition of DAG-activated currents observed (27). TRPC4/5 channels are uniquely regulated by C-terminal interactions with NHERF proteins, where in the NHERF-bound state the channel is DAG insensitive (2). Our proposed model suggests that PIP<sub>2</sub> is significant for maximal channel activity and that a balance exists between PLC-mediated hydrolysis of PIP<sub>2</sub> to make DAG which activates all of the TRPC channels and the remaining PIP<sub>2</sub> molecules that are bound to the channel. When TRPC3-7 channels lose all of the bound PIP<sub>2</sub>, due to PKC-mediated phosphorylation that weakens channel-PIP<sub>2</sub> interaction and the concurrent PIP<sub>2</sub> hydrolysis by PLC enzymes, channel currents are fully inhibited. We speculate that an interplay exists between phosphorylated channel subunits and PIP<sub>2</sub> bound subunits that lead to differences in activation and conduction in TRPC3-7 channels.

Previous studies performed to test the effect of PIP<sub>2</sub> depletion using the PI3K and PI4K inhibitor Wortmannin showed that depleting PIP<sub>2</sub> had no effect on CCh-mediated currents, whereas increasing PIP<sub>2</sub> levels reduced the extent of CCh-mediated inhibition of TRPC5 channel currents (5, 30, 18). In an attempt to resolve these conflicting results, we incubated the cells with wortmannin to achieve the full effect and successfully deplete intracellular PIP<sub>2</sub> levels and observed that wortmannin increased the rate of CCh-mediated inhibition and reduced the peak of Gd<sup>3+</sup>-activated currents. This conclusion was strengthened by the inability of increased PIP<sub>2</sub> levels to prevent complete current inhibition during simultaneous PKC and 5' phosphatase effect. This suggests that PKC-phosphorylation is dominant and, together with PIP<sub>2</sub> depletion (PLC-mediated), results in irreversible inhibition

of current that is unaffected by subsequent increases (diC<sub>8</sub>-PIP<sub>2</sub>) or decreases (by wortmannin) in PIP<sub>2</sub> levels as previously shown (5,19, 28).

Fundamentally, the PIP<sub>2</sub> dependency of several channels, including TRPC5, has been demonstrated in the inside-out patch configuration when, during patch excision, current rundown caused by a decrease in membrane PIP<sub>2</sub> levels can be reversed by addition of PIP<sub>2</sub> (8, 9). Trebak et. al established the role of an inhibitory factor that is associated with the channel in a PIP<sub>2</sub> dependent manner which was later identified by Storch and colleagues to be the NHERF1/2 proteins (2, 5). However, the dependency of the affinity of the NHERF proteins for the channel on PIP<sub>2</sub> levels remains to be explored. The underlying question to address going forward is whether channel-PIP<sub>2</sub> binding physiologically accompanies NHERF protein binding and its inhibition of channel current.

Altogether we propose a model whereby channel-PIP<sub>2</sub> interactions are important for TRPC5 channel activation as well as for maintenance of channel activity, assigning a critical functional role to PIP<sub>2</sub> for this channel. We conclude that the dependence of channel activity on PIP<sub>2</sub> levels may be a characteristic of all TRPC channels.

The broader relevance of this work is underscored by the fact that TRPC5 inhibitors are now being tested in Phase 2 studies in the clinic for the treatment of diseases caused by a leaky kidney filter, a direct consequence of the activation of TRPC5-mediated injury pathway in podocytes. A deeper understanding of the activation mechanisms of TRPC5 may enable the development of more selective and precise molecules to block TRPC5 channel activity in podocytes. Diseases driven by kidney filter damage, otherwise known as proteinuric or glomerular kidney diseases, account for the majority of the 850 million patients suffering from progressive kidney diseases worldwide. Therefore, our detailed studies can illuminate

new therapeutic opportunities for targeted therapies for a group of diseases for which there is currently a great unmet need.

## Experimental Procedures

### Cell Culture

Human embryonic kidney (HEK293T) cells and Hippocampal HT-22 cells were acquired from ATCC (Manassas, VA) and maintained in DMEM (Sigma-Aldrich, Burlington, MA) supplemented with 100 units/mL penicillin, 100 µg/mL streptomycin and 10% (vol/vol) fetal bovine serum. All cells were held at 37 °C in a humidified atmosphere with 5% CO<sub>2</sub>.

### Materials

OAG was purchased from Cayman Chemical (Ann Arbor, MI), diC<sub>8</sub>-PIP<sub>2</sub> was from Echelon Biosciences (Salt Lake City, UT) and ML204 and AC1903 were received from Dr. Corey Hopkins' Lab (University of Nebraska). PMA was purchased from LC labs (Woburn, MA), HEPES from Oakwood Chemical (Estill, SC). All other materials were purchased from Sigma-Aldrich (St. Louis, MO).

### Molecular Biology

Mouse TRPC5-GFP cDNA ([NM\\_009428.2](#)) constructs were used for whole-cell electrophysiology experiments. YFP was subcloned into the EGFP site/ C-terminal end of the plasmid using respective restriction enzymes for TIRF experiments. Amino acid exchanges from Thr to Ala at position 972 in murine TRPC5 were introduced by site-directed mutagenesis using the QuikChange system (Stratagene). The cDNA constructs used in the present work were confirmed by Sangar sequencing (Macrogen, Cambridge, MA). CIBN-CAAX-GFP and CRY2-5'-ptaseOCRL were kind gifts from the DeCamilli lab (Yale, New Haven, CT). For TIRF experiments the constructs and were modified to remove existing fluorescent proteins.



## ***Electrophysiological Whole-Cell***

### ***Measurements***

HEK293T/HT-22 cells were seeded onto glass coverslips for whole-cell patch-clamp experiments. HEK293T cells were transfected with 2.5µg of mTRPC5-GFP, 2.5µg mTRPC5-T972A-GFP, 0.75µg CIBN-CAAX-GFP and 0.75µg CRY2-5'ptase-mCherry for the respective experiments using polyethylenimine (PEI). TIRF experiments were performed on cells transfected with 1 µg of YFP-mTRPC5 or YFP-TRPC5-T972A plus or minus, 0.75 µg CIBN-CAAX-GFP and 0.75 µg CRY2-5'ptase where indicated. All experiments were performed 18-24 hours after transfection. The standard pipette solution for patch-clamp contained, in mM: 140 CsCl, 2 EGTA, 10 HEPES, 0.2 Na<sub>3</sub>-GTP, and 2 MgCl<sub>2</sub>. The bath solution contained, in mM: 140 NaCl, 5 CsCl, 10 HEPES, 2 MgCl<sub>2</sub>, 2 CaCl<sub>2</sub>, 10 glucose. Both solutions were adjusted to pH7.4 adjusted with NaOH. The patch pipettes were made using a two-step-protocol (Sutter Instruments, Novato, CA) and had a resistance. between 5 to 8 MΩ. Once the whole-cell configuration was achieved, cells were clamped at a holding potential of -60 mV using a patch-clamp amplifier (Tecella, Foothill Ranch, CA), controlled by WinWCP software (University of Strathclyde, UK). Currents were studied using a voltage ramp stimulation from -100 mV to +100 mV applied every 1s. Data low pass filtered at 2 kHz, digitized at 10 kHz and analyzed using Clampfit (Molecular Devices, San Jose, CA). Liquid junction potentials were less than 3 MΩ and were not compensated for.

### ***Total internal reflection microscopy***

Single fluorescent YFP-tagged mTRPC5 or mTRPC5-T972A channels were identified and studied at the surface of live HEK293T cells by TIRF microscopy, as described previously (1). Cells were seeded to #1.5 glass coverslips, transfected as described above and studied in the bath solution described above 18-24 hours after transfection. The evanescent wave for TIRF was

established and calibrated to 100 nm using micro mirrors positioned below a high numerical-aperture apochromat objective (60x, 1.5 NA; Olympus, Waltham, MA) mounted on an RM21 microscope frame (Mad City Labs., Madison, WI) (2). YFP was excited by a 514-nm laser line (Coherent, Santa Clara, CA) and the emission was collected through a 540/ 30 nm bandpass filter (Chroma, Bellows Falls, VT) using an sCMOS back-illuminated camera (Teledyne Photometrics, Tucson, AZ) controlled by Micro-Manager freeware. Images were captured with a 200-ms exposure every 5-s. The surface density of single fluorescent channels was determined from 3-6 random 10 x 10 µm squares per cell (representing 100 x 100 pixels), and from 4-6 cells per group using the Analyze plugin in ImageJ. Intracellular application of OAG or PIP<sub>2</sub> was accomplished by dialyzing the cytoplasm via a patch-pipette in whole-cell mode using the standard pipette solution described above. TIRF-patch mode was achieved using a micromanipulator mounted on the stage of the microscope to position the pipette, and development of whole-cell mode was monitored using a patch-clamp amplifier (Tecella, Foothill Ranch, CA) controlled by WinWCP software (University of Strathclyde, UK). To allow for full dialysis, cells were studied 200 s after whole-cell mode was established. Optogenetic dephosphorylation of PIP<sub>2</sub> was performed in cells co-transfected with CRY2-5'-ptaseOCRL and CIBN-CAAX (see **Molecular Biology**) using 100-s illumination from a 445 nm laser line (Coherent, Santa Clara, CA).

### ***Statistical analysis***

All statistical analyses were carried out using Graphpad Prism software. Results are presented as Mean ± SEM unless otherwise indicated. The comparisons were carried out using the Student's t-test. P < 0.05 was considered statistically significant.

## AUTHOR INFORMATION

### Corresponding Author

[d.logothetis@northeastern.edu](mailto:d.logothetis@northeastern.edu)

### Author Contributions

M.N and L.D.P performed research and analyzed data. M.N, L.D.P, A.G and D.E.L designed research. M.N and D.E.L wrote the paper.

### Funding Sources

The work was supported by Grants R01HL09549-23 to D.E.L., R01HL144615 to LDP, and R01DK095045 and R01DK099465 to AG.

### Acknowledgments

We thank the members of the D.E.L. laboratory. Takeharu Kawano for help with molecular biology and Heikki Vaananen for technical support. We are grateful to Yiming Zhou, Juan Lorenzo Pablo and James Pentikis for helpful discussions.

### Conflict of Interest statement

A.G. has a financial interest in Goldfinch Biopharma which was reviewed and is managed by Brigham and Women's Hospital, Mass General Brigham (MGB) and the Broad Institute of MIT and Harvard in accordance with their conflict of interest policies.

## References

1. Clapham, D. E. (2003) TRP channels as cellular sensors. *Nature* **426**, 517-524
2. Storch, U., Forst, A.L., Pardatscher, F., Erdogmus, S., Philipp, M., Gregoritz, M., y Schnitzler, M.M., and Gudermann, T. (2017) Dynamic NHERF interaction with TRPC4/5 proteins is required for channel gating by diacylglycerol. *Proceedings of the National Academy of Sciences* **114**, 37-46
3. Schaldecker, T., Kim, S., Tarabanis, C., Tian, D., Hakroush, S., Castonguay, P., Ahn, W., Wallentin, H., Heid, H., Hopkins, C.R., Lindsley, C.W., Riccio, A., Buvall, L., Weins, A., and Greka, A. (2013) Inhibition of the TRPC5 ion channel protects the kidney filter. *The Journal of clinical investigation* **123**, 5298-5309
4. Bezzerides, V. J., Ramsey, I. S., Kotecha, S., Greka, A., and Clapham, D. E. (2004) Rapid vesicular translocation and insertion of TRP channels. *Nature cell biology* **6**, 709-720
5. Trebak, M., Lemonnier, L., DeHaven, W. I., Wedel, B. J., Bird, G. S., and Putney, J. W. (2009) Complex functions of phosphatidylinositol 4, 5-bisphosphate in regulation of TRPC5 cation channels. *Pflügers Archiv-European Journal of Physiology* **457**, 757-769
6. Zhou, Y., Castonguay, P., Sidhom, E.H., Clark, A.R., Dvela-Levitt, M., Kim, S., Sieber, J., Wieder, N., Jung, J.Y., Andreeva, S., Reichardt, J., Dubois, F., Hoffmann, S.C., Basgen J.M., Montesinos, M.S., Weins, A., Johnson, A.C., Lander, E.S., Garrett, M.R., Hopkins, C.R., and Greka, A. (2017) A small-molecule inhibitor of TRPC5 ion channels suppresses progressive kidney disease in animal models. *Science* **358**, 1332-1336
7. Venkatachalam, K., Zheng, F., and Gill, D. L. (2003) Regulation of canonical transient receptor potential (TRPC) channel function by diacylglycerol and protein kinase C. *Journal of Biological Chemistry* **278**, 29031-29040
8. Hilgemann, D.W., and Ball R. (1996) Regulation of cardiac Na<sup>+</sup>, Ca<sup>2+</sup> exchange and K<sub>ATP</sub> potassium channels by PIP<sub>2</sub>. *Science* **273**, 956-9
9. Logothetis, D.E., Petrou, V.I., Zhang, M., Mahajan, R., Meng, X.Y., Adney, S.K., Cui, M., and Baki, L. (2015) Phosphoinositide

- control of membrane protein function: a frontier led by studies on ion channels. *Annual Review of Physiology* **77**, 81-104
10. Hansen, S. B., Tao, X., and MacKinnon, R. (2011) Structural basis of PIP 2 activation of the classical inward rectifier K<sup>+</sup> channel Kir2.2. *Nature* **477**, 495-498
11. Whorton, M. R., and MacKinnon, R. (2011) Crystal structure of the mammalian GIRK2 K<sup>+</sup> channel and gating regulation by G proteins, PIP<sub>2</sub>, and sodium. *Cell* **147**, 199-208
12. Whorton, M. R., and MacKinnon, R. (2013) X-ray structure of the mammalian GIRK2-βγ G-protein complex. *Nature* **498**, 190-197
13. Li, D., Jin, T., Gazgalis, D., Cui, M., and Logothetis, D. E. (2019) On the mechanism of GIRK2 channel gating by phosphatidylinositol bisphosphate, sodium, and the Gβγ dimer. *Journal of Biological Chemistry* **294**, 18934-18948
14. Duan, J., Li, J., Chen, G.L., Ge, Y., Liu, J., Xie, K., Peng, X., Zhou, W., Zhong, J., Zhang, Y., and Xu, J. (2019) Cryo-EM structure of TRPC5 at 2.8-Å resolution reveals unique and conserved structural elements essential for channel function. *Science advances* **5**
15. Chen, X., Li, W., Riley, A. M., Soliman, M., Chakraborty, S., Stamatkin, C. W., and Obukhov, A. G. (2017) Molecular determinants of the sensitivity to Gq/11-phospholipase C-dependent gating, Gd3<sup>+</sup> potentiation, and Ca<sup>2+</sup> permeability in the transient receptor potential canonical type 5 (TRPC5) channel. *Journal of Biological Chemistry* **292**, 898-911
16. Jung, S., Mühle, A., Schaefer, M., Strotmann, R., Schultz, G., and Plant, T. D. (2003) Lanthanides potentiate TRPC5 currents by an action at extracellular sites close to the pore mouth. *Journal of Biological Chemistry* **278**, 3562-3571
17. Semtner, M., Schaefer, M., Pinkenburg, O., and Plant, T. D. (2007) Potentiation of TRPC5 by protons. *Journal of Biological Chemistry* **282**, 33868-33878
18. Sharma, S., and Hopkins, C. R. (2019) Review of transient receptor potential canonical (TRPC5) channel modulators and diseases: miniperspective. *Journal of medicinal chemistry* **62**, 7589-7602
19. Zhu, M.H., Chae, M., Kim, H.J., Lee, Y.M., Kim, M.J., Jin, N.G., Yang, D.K., So, I. and Kim, K.W. (2005) Desensitization of canonical transient receptor potential channel 5 by protein kinase C. *American Journal of Physiology-Cell Physiology* **289**, 591-600
20. Kobilinsky, E., Mirshahi, T., Zhang, H., Jin, T., and Logothetis, D. E. (2000) Receptor-mediated hydrolysis of plasma membrane messenger PIP 2 leads to K<sup>+</sup>-current desensitization. *Nature cell biology* **2**, 507-514
21. Keselman, I., Fribourg, M., Felsenfeld, D. P., & Logothetis, D. E. (2007) Mechanism of PLC-mediated Kir3 current inhibition. *Channels* **1**, 113-123
22. Rohacs, T. (2014) Phosphoinositide regulation of TRP channels. *Mammalian Transient Receptor Potential (TRP) Cation Channels*, 1143-1176. *In Results*
23. Idevall-Hagren, O., Dickson, E. J., Hille, B., Toomre, D. K., and De Camilli, P. (2012) Optogenetic control of phosphoinositide metabolism. *Proceedings of the National Academy of Sciences* **109**, 2316-2323
24. Atwood, B. K., Lopez, J., Wager-Miller, J., Mackie, K., and Straiker, A. (2011) Expression of G protein-coupled receptors and related proteins in HEK293, AtT20, BV2, and N18 cell lines as revealed by microarray analysis. *BMC genomics* **12**, 1-14
25. Tang, Q. Y., Zhang, Z., Xia, J., Ren, D., and Logothetis, D. E. (2010) Phosphatidylinositol 4, 5-bisphosphate activates Slo3 currents and its hydrolysis underlies the epidermal growth factor-induced current inhibition. *Journal of Biological Chemistry* **285**, 19259-19266
26. Miller, M., Shi, J., Zhu, Y., Kustov, M., Tian, J.B., Stevens, A., Wu, M., Xu, J., Long, S.,

- Yang, P. and Zholos, A.V. (2011) Identification of ML204, a novel potent antagonist that selectively modulates native TRPC4/C5 ion channels. *Journal of Biological Chemistry* **286**, 33436-33446
27. Itsuki, K., Imai, Y., Hase, H., Okamura, Y., Inoue, R., and Mori, M. X. (2014) PLC-mediated PI (4, 5) P<sub>2</sub> hydrolysis regulates activation and inactivation of TRPC6/7 channels. *Journal of General Physiology* **143**, 183-201
28. Kim, B. J., Kim, M. T., Jeon, J. H., Kim, S. J., and So, I. (2008) Involvement of phosphatidylinositol 4, 5-bisphosphate in the desensitization of canonical transient receptor potential 5. *Biological and Pharmaceutical Bulletin* **31**, 1733-1738.
29. Plant, L. D., Xiong, D., Romero, J., Dai, H., and Goldstein, S. A. (2020) Hypoxia produces pro-arrhythmic late sodium current in cardiac myocytes by SUMOylation of NaV1. 5 channels. *Cell reports* **30**, 2225-2236. *In Methods*
30. Larson, J., Kirk, M., Drier, E. A., O'brien, W., MacKay, J. F., Friedman, L. J., and Hoskins, A. A. (2014) Design and construction of a multiwavelength, micromirror total internal reflectance fluorescence microscope. *Nature Protocols* **9**, 2317-2328. *In Methods*



# Figures and Legends

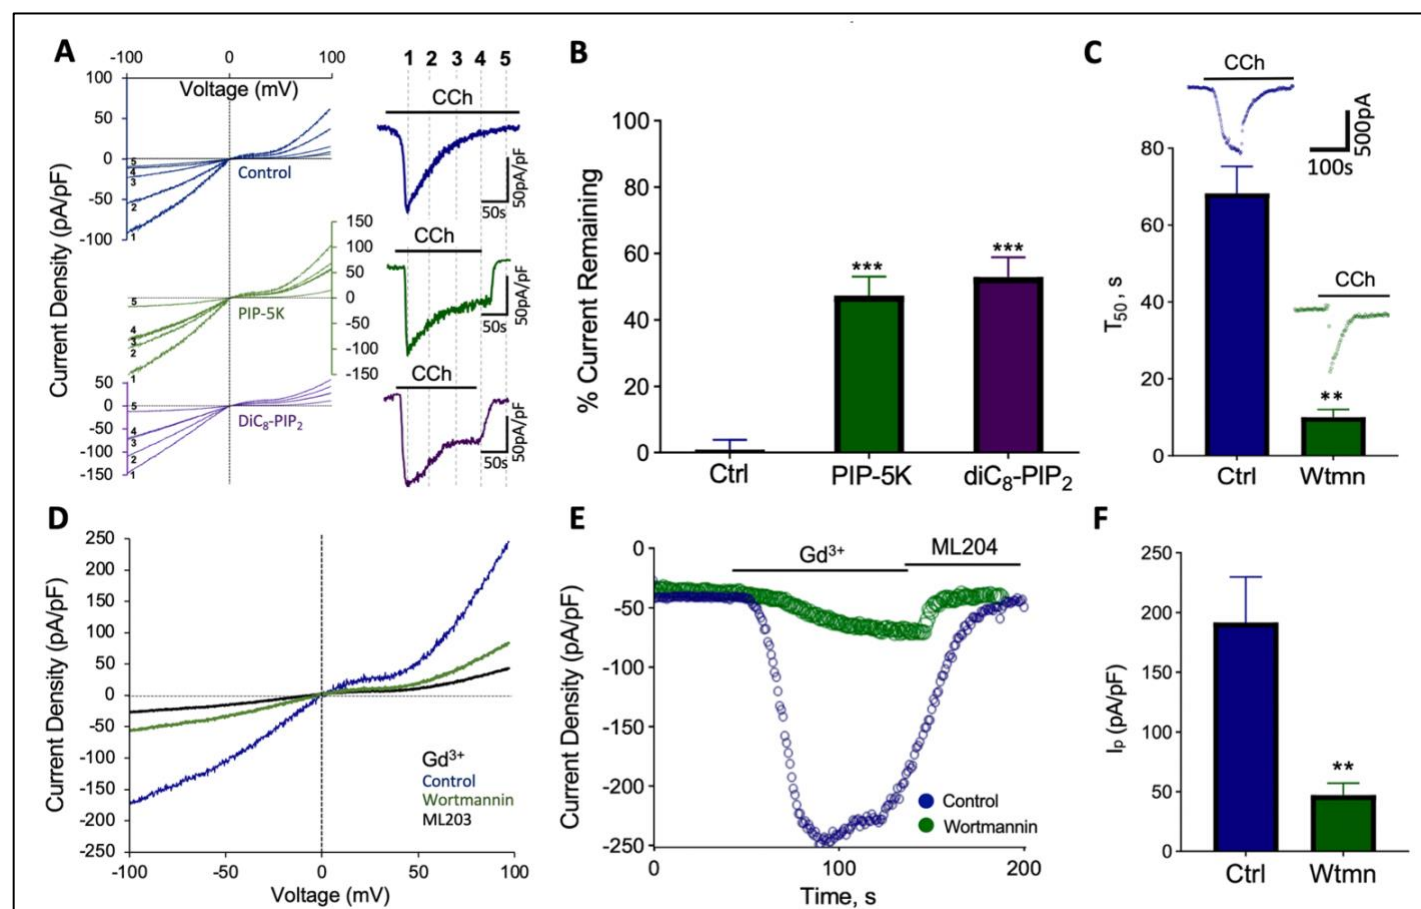

**Figure 1. PIP<sub>2</sub> implicated in PKC-mediated desensitization and promotion of Gd<sup>3+</sup>-activated TRPC5 currents.** **A)** Left: Example current-density, voltage relationships for HEK293T cells expression mTRPC5-GFP. Currents were evoked by a ramp from -100 mV to 100 mV follow application of 100  $\mu$ M CCh. Cells were studied under control conditions (blue), or with PIP-5K co-expression (green) or with 200  $\mu$ M diC<sub>8</sub>-PIP<sub>2</sub> in the pipette (purple). The spontaneous decrease in current is illustrated by sweeps labeled 1-5, which correspond to 50 s intervals, as illustrated on the exemplar time courses (Right). **B)** Mean of % current remaining during 100  $\mu$ M CCh treatment in control HEK293T cells expressing mTRPC5-GFP (n=12, mean  $0.89 \pm 0.85$ ), with overexpression of PIP-5K (n=9, mean  $47.07 \pm 1.81$ ) and with diC<sub>8</sub>-PIP<sub>2</sub> in the pipette (n=10, mean  $52.32 \pm 1.86$ ). **C)** Bar graph of time taken from peak to 50% current decay ( $T_{50}$ ) of control HEK293T cells expressing mTRPC5-GFP (n=11, mean  $68.82 \pm 7.52$ ) and after treatment with 20  $\mu$ M wortmannin for 1 hour (n=9, mean  $10.23 \pm 1.91$ ); Top: Representative whole-cell patch-clamp recording of HEK293T cells expressing TRPC5-GFP activated by 100  $\mu$ M CCh. **D)** Current density voltage curves of the  $\pm 100$ mV ramp of 100  $\mu$ M Gd<sup>3+</sup> activation in TRPC5-GFP expressing HEK293T cells (control) and after 1 hour treatment with 20 $\mu$ M Wortmannin. **E)** Representative whole-cell Current density (pA/pF) curves observed in HEK293T cells overexpressing mTRPC5-GFP activated with 100  $\mu$ M GdCl<sub>3</sub> and upon 20  $\mu$ M wortmannin treatment for 1 hour. **F)** Bar graph of  $I_p$  (peak current density-pA/pF) of control HEK293T cells expressing TRPC5-GFP (n=5, mean  $191 \pm 45.09$ ) and cells treated with wortmannin (n=5, mean  $49.35 \pm 9.94$ ). P-values established using Student's t-test. \*\*  $p < 0.001$ , \*\*\*  $p < 0.0001$ .

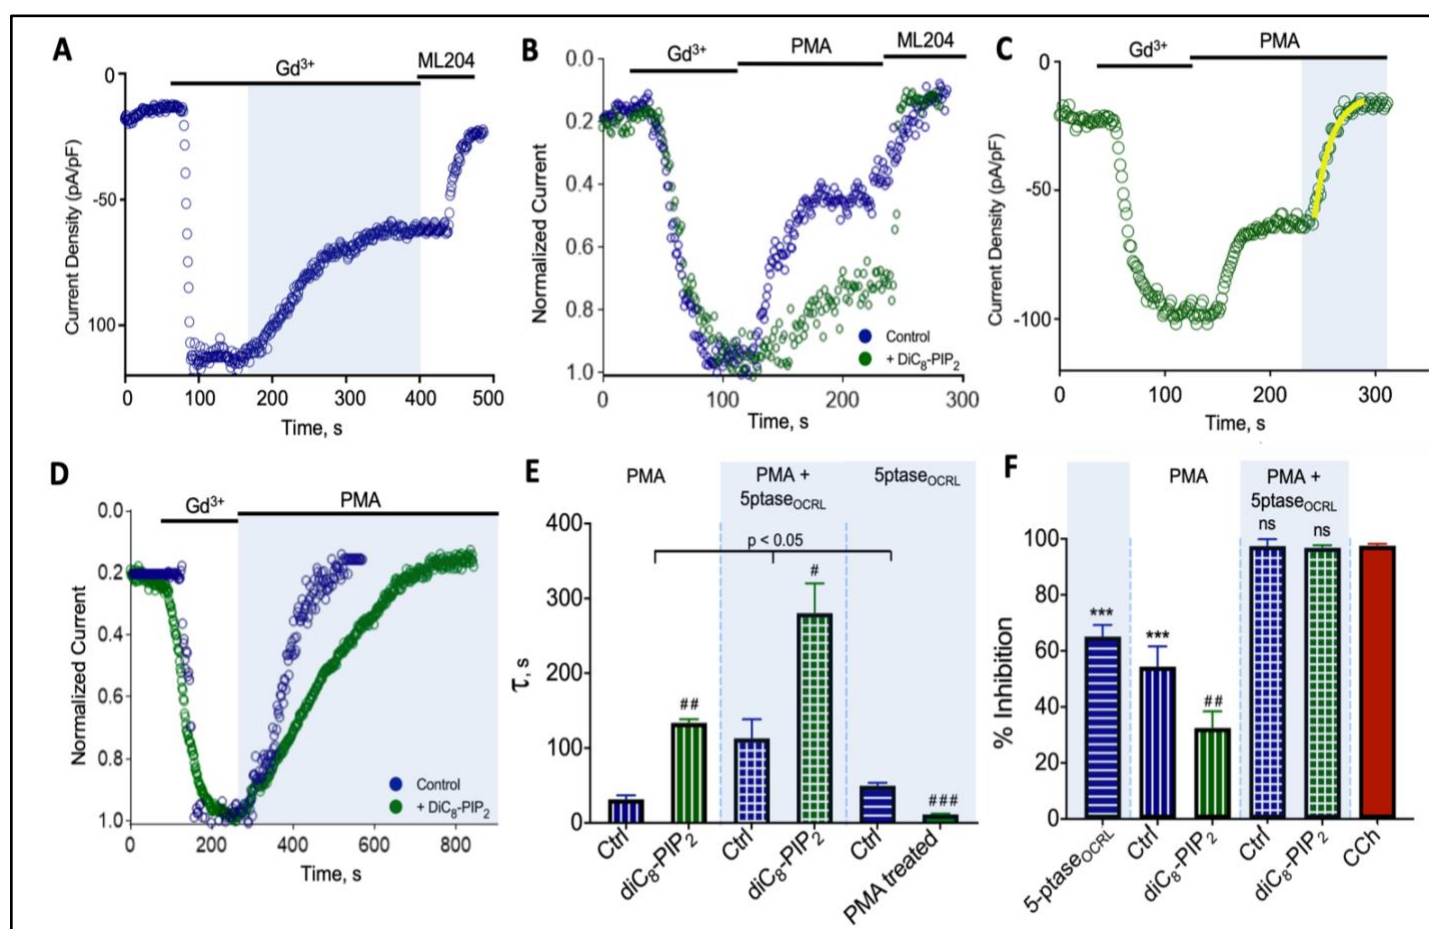

**Figure 2. TRPC5 current inhibition by PKC-mediated phosphorylation and/or PIP<sub>2</sub> dephosphorylation reveals an underlying decrease in channel-PIP<sub>2</sub> interactions.** **A)** Whole-cell patch clamp recording of HEK293T cells expressing TRPC5- GFP, light- activated CRY2- 5'PTASE<sub>OCRL</sub> and CIBN-CAAX-GFP (see Methods), inward current activated by 100  $\mu$ M GdCl<sub>3</sub> with channel current decrease in response to light-activated metabolism of PIP<sub>2</sub> and remaining current blocked by 3  $\mu$ M ML204. **B)** Inhibition observed by PKC-activator PMA without/with 200  $\mu$ M diC<sub>8</sub>-PIP<sub>2</sub> in the pipette. **C)** HEK-293T cells expressing TRPC5-GFP, CRY2-5'ptase and CIBN-CAAX-GFP were activated using 100  $\mu$ M GdCl<sub>3</sub>, 200 nM PMA was applied to activate PKC enzymes followed by blue-light exposure. **D)** Inhibition observed by simultaneous application of PKC-activator PMA and activation of light-activated inositol phosphatase without/with 200  $\mu$ M diC<sub>8</sub>-PIP<sub>2</sub> in the pipette. **E)** Bar graph of the mean decay constant of PMA-mediated inhibition alone (n=5, 31.44  $\pm$  5.55) and with diC<sub>8</sub>-PIP<sub>2</sub> (n=5, 133.95  $\pm$  4.48), simultaneous PMA and 5'-ptase<sub>OCRL</sub> mediated inhibition (n=6, 112.97  $\pm$  25.67) and with diC<sub>8</sub>-PIP<sub>2</sub> (n=5, 280.33  $\pm$  39.77), and 5'-ptase<sub>OCRL</sub> mediated inhibition alone (n=8, 52.57  $\pm$  4.70) and after PMA treatment (n=5, 11.43  $\pm$  0.92). **F)** Bar graph summary of mean % current inhibition (\* values, compared with CCh) by 5'-ptase<sub>OCRL</sub> (n=8, 65.18  $\pm$  2.37), PMA mediated inhibition alone (n=5, 54.4  $\pm$  4.17) and with diC<sub>8</sub>-PIP<sub>2</sub> (n=5, 32.47  $\pm$  3.48), simultaneous PMA and 5'-ptase<sub>OCRL</sub> mediated inhibition (n=6, 97.51  $\pm$  1.38) and with diC<sub>8</sub>-PIP<sub>2</sub> (n=5, 96.87  $\pm$  0.47), and when activated using 100 $\mu$ M CCh (n=12, 97.61  $\pm$  0.33). P-values established using Students' t-test. #; denotes comparison with experimental Ctrl, #  $p < 0.01$ , ##  $p < 0.001$ , ###  $p < 0.0001$ .

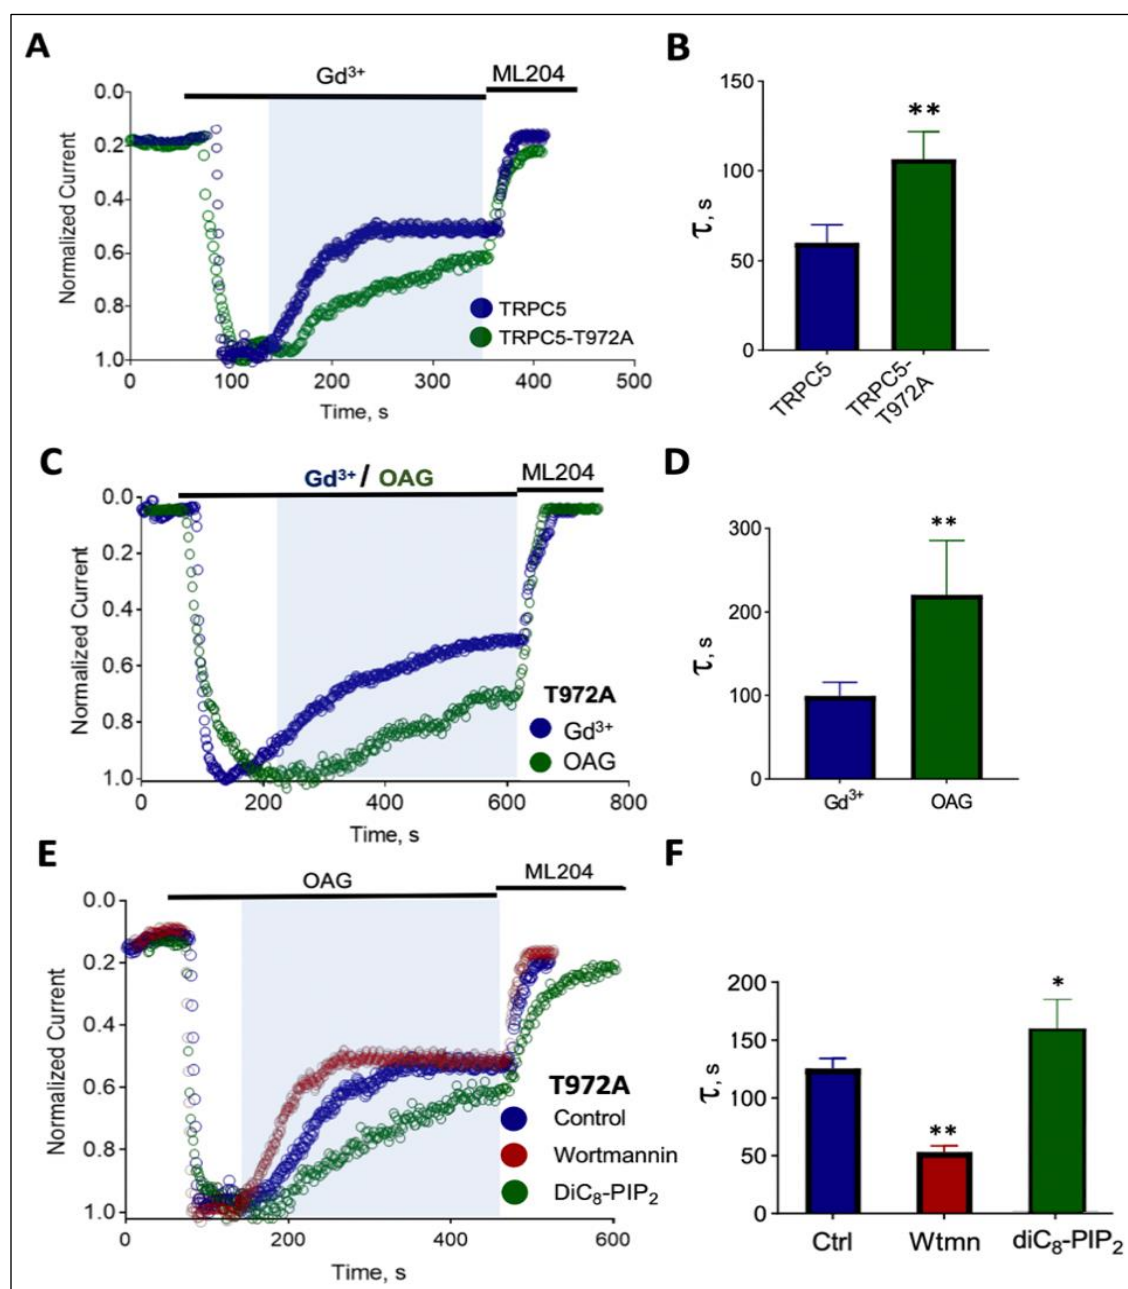

**Figure 3. OAG mediated activation of TRPC5 channels shows enhanced channel- PIP<sub>2</sub> interaction strength.**

**A)** HEK-293T cells expressing TRPC5-GFP/TRPC5-T972A-GFP, CRY2-5'ptase and CIBN-CAAX-GFP were activated using 100 μM GdCl<sub>3</sub> and effect of blue-light exposure was observed. **B)** Bar graph of the mean decay constant of inhibition for TRPC5 (n=6, 60 ± 5.77) for mTRPC5- T972A (n=4, 106.67 ± 8.82.) **C)** HEK-293T cells expressing TRPC5-T972A-GFP, CRY2-5'ptase and CIBN-CAAX-GFP were activated using saturated concentration of Gd<sup>3+</sup> (150 μM) or OAG (200 μM) and effect of blue-light exposure was observed. **D)** Bar graph of the mean decay constant of inhibition when activated by 150μM Gd<sup>3+</sup> (n=5, 99.55 ± 8.15) and 200μM of OAG (n=5, 220.5 ± 32.34). **E)** HEK-293T cells expressing TRPC5-T972A-GFP, CRY2-5'ptase and CIBN-CAAX-GFP were activated using 100μM OAG (control), incubated in 20 μM Wortmannin for 1 hour and with 200 μM diC<sub>8</sub>-PIP<sub>2</sub> in the pipette. **F)** Bar graph of the mean decay constant of inhibition for control (n=5, 125.5 ± 4.35), with wortmannin (n=5, 53.25 ± 2.69), and with diC<sub>8</sub> PIP<sub>2</sub> (n=5, 178.25 ± 5.45). P-values established using Students' t-test. \* *p* < 0.01, \*\* *p* < 0.001, \*\*\* *p* < 0.0001

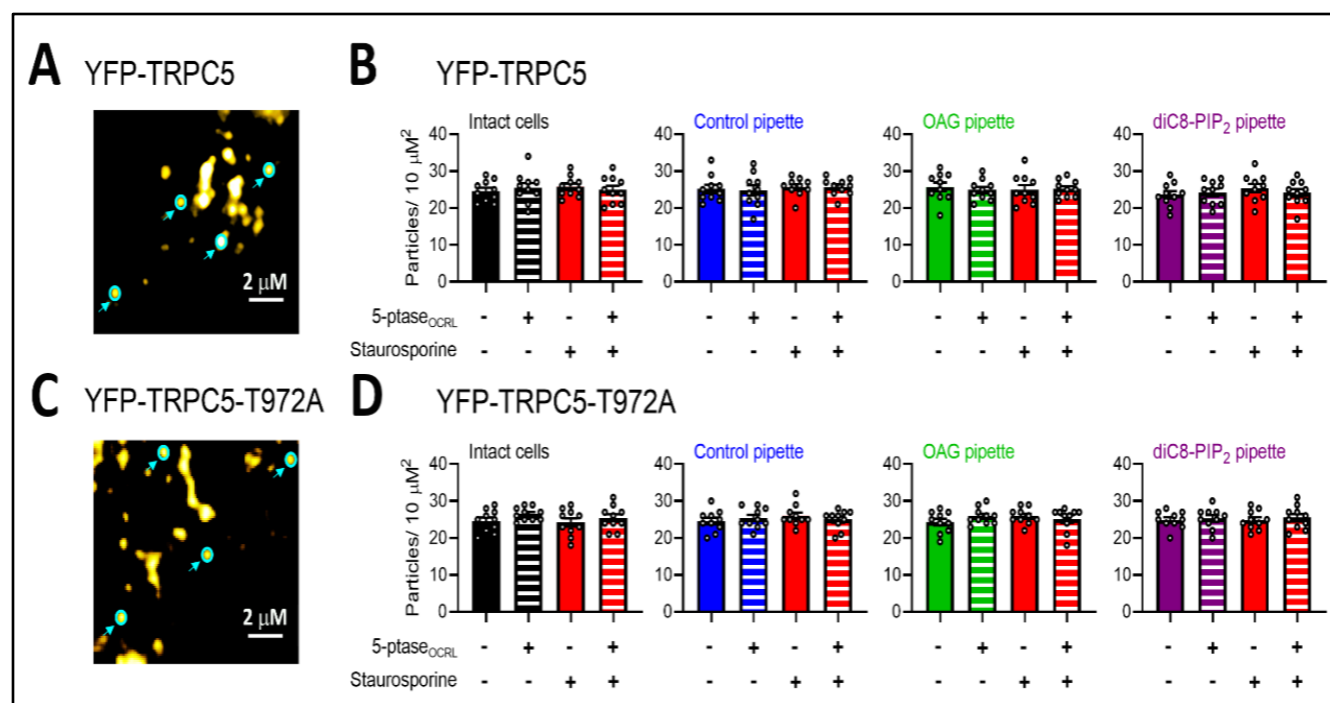

**Figure 4. Regulation by OAG or PIP<sub>2</sub> does not alter the surface-density of YFP-TRPC5 channels.** YFP-tagged mTRPC5 or mTRPC5-T972A channels were expressed in HEK293T cells and studied by patch-clamp TIRF. The number of fluorescent particles was determined 200 s after whole-cell mode was established to allow dialysis of the cells with control solution (blue), 200  $\mu\text{M}$  OAG (green) or 200  $\mu\text{M}$  diC8-PIP<sub>2</sub> (purple). Cells were studied with or without optogenetic activation of 5'-ptase<sub>OCRL</sub> (white stripped bars) or following incubation with 1  $\mu\text{M}$  staurosporine (red). Bar graphs represent particle-density as mean  $\pm$  s.e.m. number of fluorescent particles in the TIRF field in 3-6 random 10 x 10  $\mu\text{m}$  squares per cell and from 4-6 cells per group. **A)** TIRF image showing YFP-tagged wild type mTRPC5 channels at the cell surface. Four example particles corresponding to single TRPC5 channels are highlighted in cyan. **B)** Bar graphs summarizing the density of fluorescent particles indicating no change from control values under any of the conditions studied. **C)** TIRF image showing YFP-tagged mTRPC5-T972A channels at the cell surface. Four example particles corresponding to single TRPC5 channels are highlighted in cyan. **D)** Bar graphs summarizing the density of fluorescent particles indicating no change from control values under any of the conditions studied.



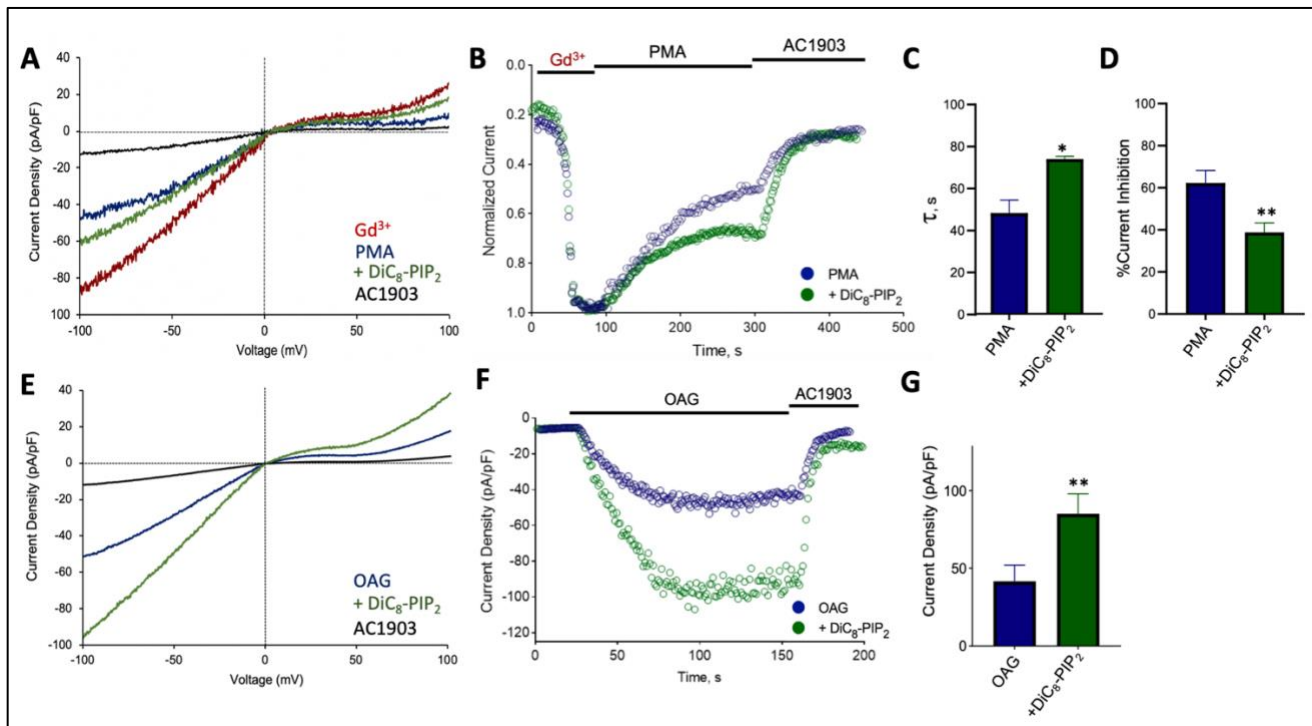

**Figure 5. PIP<sub>2</sub> prevents PKC-mediated desensitization and promotes OAG-mediated activation in endogenously expressed TRPC5 channels.** **A)** Current density voltage curves of the  $\pm 100$ mV ramp of 100  $\mu$ M  $Gd^{3+}$ , PMA inhibition with/ without 200  $\mu$ M diC<sub>8</sub>-PIP<sub>2</sub> in the pipette and inhibition with 100  $\mu$ M AC1903. **B)** Representative whole-cell recording of PMA mediated inhibition of  $Gd^{3+}$  with/ without 200  $\mu$ M diC<sub>8</sub>-PIP<sub>2</sub>. **C)** Bar graph summary of mean decay constant of inhibition observed with PMA (Ctrl n=3, 49.5  $\pm$  4.5) and with 200  $\mu$ M diC<sub>8</sub>-PIP<sub>2</sub> (n=3, 76  $\pm$  1.3). **D)** Bar graph summary of % current inhibited with PMA (Ctrl n=3, 62.26  $\pm$  2.96) and with 200 $\mu$ M diC<sub>8</sub>-PIP<sub>2</sub> (n=3, 38.8  $\pm$  3.2). **E)** Current density voltage curves of the  $\pm 100$ mV ramp in HT-22 cells treated with 1 $\mu$ M staurosporine for 30 mins, of 100  $\mu$ M OAG activation with/ without 200  $\mu$ M diC<sub>8</sub>-PIP<sub>2</sub> in the pipette and inhibition with 100  $\mu$ M AC1903. **F)** Representative whole-cell recording of 100 $\mu$ M OAG activated currents in HT-22 cells treated with 1 $\mu$ M staurosporine for 30 mins, with/ without 200  $\mu$ M diC<sub>8</sub>-PIP<sub>2</sub>. **G)** Bar graph summary of peak current density observed with 100  $\mu$ M OAG (Ctrl n=3, 42.5  $\pm$  11.8) and with 200  $\mu$ M diC<sub>8</sub>-PIP<sub>2</sub> (n=3, 81.6  $\pm$  18.3).

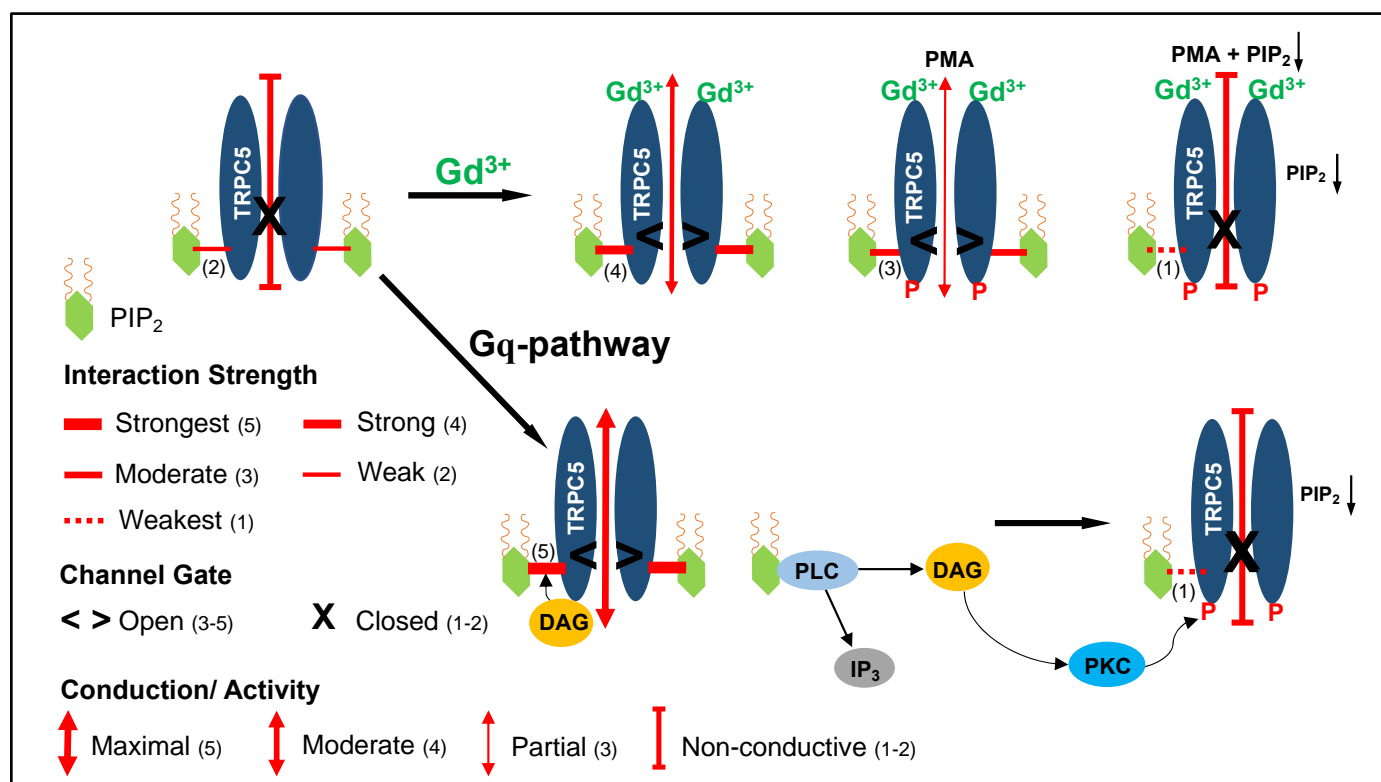

**Figure 6.** Cartoon model of the dependency of TRPC5 channel on PIP<sub>2</sub> to account for stimulation and inhibition of channel activity by independent gating mechanisms.

**Trivalent cation-mediated control of TRPC5 activity:** Trivalent cation activation mediated by Gd<sup>3+</sup> allosterically strengthens channel interactions with PIP<sub>2</sub>, strongly enough to cause partial activation. PMA-treatment alone (PKC-mediated phosphorylation but not PIP<sub>2</sub> depletion) weakens channel-PIP<sub>2</sub> interaction strength and causes partial inhibition of channel currents. Similarly, depletion of intracellular PIP<sub>2</sub> levels (using wortmannin or 5'-phosphatase) alone (PIP<sub>2</sub> depletion but not PKC-mediated phosphorylation as in T972A) causes partial inhibition. The combination of PMA-treatment and PIP<sub>2</sub> depletion strips the channel from its PIP<sub>2</sub> severely enough to cause full inhibition.

**Gq-mediated control of TRPC5 activity:** Upon Gq-receptor activation, PLC hydrolyzes PIP<sub>2</sub> to IP<sub>3</sub> and DAG. DAG allosterically enhances strongly channel interactions with PIP<sub>2</sub> activating the channel maximally. PIP<sub>2</sub> depletion (such as by dephosphorylation of PIP<sub>2</sub>) alone (without PKC-mediated phosphorylation as in T972A) causes partial inhibition. The ensuing DAG activation of PKC causes channel phosphorylation at T972, which allosterically weakens channel-PIP<sub>2</sub> interactions enough, that adds up to the PIP<sub>2</sub> depletion causing full inhibition of the current.
